# Supplementary material for: Lanthanide-doped NaYF 4 upconversion nanoparticles as bifunctional catalysts for overall water splitting
Source: Royal Society of Chemistry journal article supplement (doi:10.1039/d5cc05901a), 2026-01-01
Supplement: d5cc05901a1.pdf [file d5cc05901a1.pdf]

## **Electronic Supporting Information**

### **Lanthanide-doped NaYF<sub>4</sub> Upconversion Nanoparticles as Bifunctional Catalysts for Overall Water Splitting**

*Debika Gogoi,<sup>a</sup> Soumantika Jana,<sup>a</sup> Neha Patel,<sup>a</sup> Bo-Yan Feng,<sup>b</sup> Chi-Sheng Wu,<sup>b\*</sup> Rakesh K. Sharma<sup>a\*</sup>*

<sup>a</sup> Sustainable Materials and Catalysis Research Lab, IIT Jodhpur, India

<sup>b</sup> Department of Chemical Engineering, National Taiwan University, Taiwan

#### **S1. Materials and Methods**

##### **S1.1. Chemicals used.**

Yttrium (III) Nitrate hexahydrate was purchased from Alfa Aesar. Ytterbium (III) nitrate hexahydrate was purchased from Sisco Research Laboratories (SRL), Citric acid was purchased from Acros Organics. Sodium Fluoride and Potassium Hydroxide (KOH) were purchased from Fisher Scientific. Polyvinylidene difluoride (PVDF), carbon black, N-methyl-2-pyrrolidinone (NMP), Erbium (III) nitrate pentahydrate, and Thulium (III) nitrate pentahydrate were purchased from Sigma-Aldrich. All the chemicals were used without further purification. Deionized water was used throughout the experiment.

##### **S1.2. Synthesis of upconversion nanoparticles**

To synthesize NaYF<sub>4</sub>:Yb<sup>3+</sup>/Er<sup>3+</sup>, a mixture of Yttrium (III) nitrate hexahydrate (1.045 g), Ytterbium (III) nitrate pentahydrate (0.314 g), and Erbium (III) nitrate pentahydrate (0.031 g) was dissolved in approximately 15 mL of distilled water in a beaker. In a separate beaker, citric acid trisodium salt (27.8 g) was dissolved in 70 mL of distilled water. The lanthanide salt solution was then added dropwise to the citric acid solution under continuous stirring, and the resulting mixture was stirred for approximately 3 hours. Subsequently, sodium fluoride (NaF, 2.644 g) was introduced into the solution, followed by an additional stirring period of 4 hours. The final mixture was transferred to a Teflon-lined stainless-steel autoclave and subjected to hydrothermal treatment at 200°C for 2 hours. After cooling to room temperature, the obtained product was thoroughly washed with distilled water and ethanol, then dried overnight at 65°C. NaYF<sub>4</sub>:Yb<sup>3+</sup>/Tm<sup>3+</sup> was prepared by following the same procedure, only Thulium (III) nitrate pentahydrate was used instead of Er(NO<sub>3</sub>)<sub>3</sub>·5H<sub>2</sub>O.

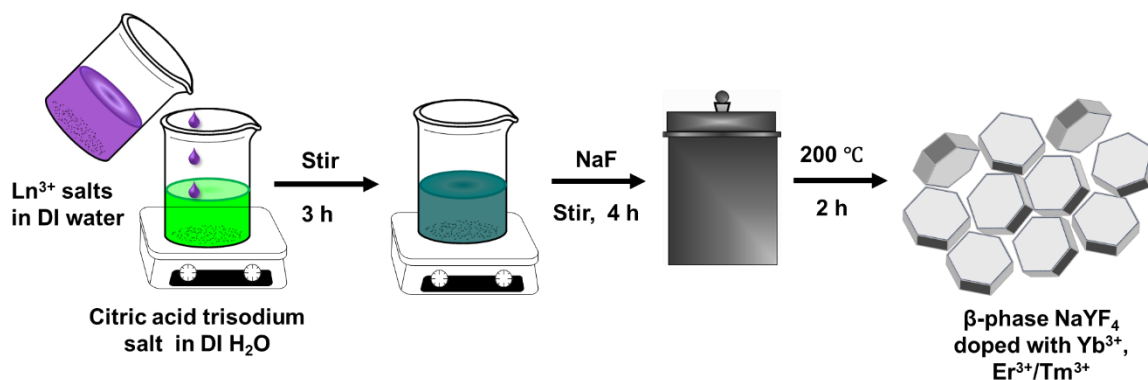

**Scheme S1.** Synthesis route of the lanthanide (Yb<sup>3+</sup>, Er<sup>3+</sup>/Tm<sup>3+</sup>) doped  $\beta$ -NaYF<sub>4</sub>.

## S2. Characterization of the synthesized materials and instrument details

In this present work, the in-depth characterization of the synthesized materials were carried out by using the following characterization techniques: (i) X-ray diffraction (XRD, PANalytical EMPYREAN with Cu K $\alpha$  ( $\lambda = 0.15405$  nm) radiation at a scanning speed of 3° min<sup>-1</sup>), (ii) Raman spectra (Bay Spec., Nomadic Raman microscope with a 532 nm laser excitation), (iii) Field emission scanning electron microscopy (FESEM, Thermo-Scientific, APREO 2S), (iv) High-resolution transmission electron microscopy (HR-TEM, Cs-corrected STEM, JEOL ARM 200 CF), (v) Energy dispersive X-ray spectra (EDX, Oxford Instruments attached to a Carl Zeiss SEM), (vi) X-ray Photoelectron Spectroscopy (XPS, Thermo-Scientific, Theta Probe spectrometer) (vii) A CHI660E-CH instruments electrochemical workstation was used to perform all the electrochemical studies. (viii) A Photo Emission Tech., Inc. make Xenon lamp (#SS50AAA) was used as a light source.

## S3. Electrode preparation

Nickel foam (5 mm  $\times$  5 mm) was used as the conductive substrate for the UCNP-based catalysts in this study. Prior to use, the NF was cleaned by dipping it in 0.5 M HCl and sonicated for 30 minutes to remove surface oxide layers. It was then thoroughly rinsed with deionized water and ethanol, followed by drying in an oven for 5 hours. To prepare the catalyst ink, 500  $\mu$ L of N-methyl-2-pyrrolidone (NMP) and 5 mg of polyvinylidene fluoride (PVDF) were mixed and stirred until a clear solution was obtained. Separately, 5 mg of carbon black was uniformly blended with 40 mg of the catalyst. These two mixtures were then combined and stirred continuously at  $\sim$ 400 rpm for  $\sim$ 12 hours. The resulting slurry (catalyst ink) was applied onto the NF via drop-casting and subsequently dried in an oven.

For the measurement of Mott-Schottky plots, the working electrode was prepared by uniformly dropping the suspension (10 mg sample, 10  $\mu$ l Nafion, 250  $\mu$ l ethanol, sonicated for 30 min) on FTO glass (0.5 cm  $\times$  0.5 cm) and dried at 80°C overnight. Then the EIS (Impedance potential mode on CH Instrument potentiostat) was measured in the voltage range of 0 to -1.5 V with the frequency of 1000 Hz.

#### S4. Equations used:

- To convert all measured potentials versus Ag/AgCl to potentials versus RHE, we used the following equation:

$$E_{\text{RHE}} = E_{\text{Ag/AgCl}} + 0.059 \text{ pH} + 0.197 \quad (\text{S1})$$

- The overpotentials ( $\eta$ ) for hydrogen evolution reaction (HER) were calculated using equation:

$$\eta = E_{\text{RHE}} - E_{\text{equilibrium}} \quad (\text{S2})$$

- The overpotentials ( $\eta$ ) for oxygen evolution reaction (OER) were then calculated using equation:

$$\eta = E_{\text{RHE}} - 1.23 \quad (\text{S3})$$

- These overpotentials were subsequently employed in the Tafel equation to derive the Tafel slope (in mV/dec):

$$\eta = b \log j + a \quad (\text{S4})$$

- Electrochemical impedance spectroscopy (EIS) was conducted within a frequency range of 0.01 Hz to 100 kHz (with an amplitude of 5 mV) at -0.28 V versus RHE (for HER) and at 1.55 V vs. RHE (for OER).
- The ECSA of the catalysts was calculated using the following equation:

$$\text{ECSA} = C_{\text{dl}}/C_s \quad (\text{S5})$$

where  $C_{\text{dl}}$  is the measured double-layer capacitance, and  $C_s$  is the specific capacitance of the catalyst (0.04 mF/cm<sup>2</sup> in 1 M KOH). The double-layer capacitance ( $C_{\text{dl}}$ ) was measured by cyclic voltammetry within the non-Faradaic region at various scan rates, using 1 M KOH as the electrolyte. The slope of the plot  $\Delta j$  versus scan rate provides the value of  $C_{\text{dl}}$ .

- The turnover frequency (TOF) of the catalysts was calculated with the equation:

$$\text{TOF} = j \times N_A / n \times F \times N_d \quad (\text{S6})$$

where  $j$  is the measured current density,  $N_A$  is Avogadro's number ( $6.0232 \times 10^{23} \text{ mol}^{-1}$ ),  $n$  represents the number of electron transfers (for HER,  $n=2$  and for OER,  $n=1$ ),  $F$  is the Faraday constant (96,485 C/mol), and  $N_d$  is the number of active sites involved in the reaction. The value of  $N_d$  was estimated by measuring the voltammetric charge ( $Q$ ) in the non-Faradaic region and using the following equation:

$$N_d = Q / \text{Scan rate} \times 1.602 \times 10^{-19} \quad (\text{S7})$$

- Exchange current density ( $i_{\text{ex}}$ ) was calculated using the following equation:

$$i_{\text{ex}} = RT / nF\theta A \quad (\text{S8})$$

Where  $R$  is the universal gas constant ( $8.314 \text{ J K}^{-1} \text{ mol}^{-1}$ ),  $T$  is the reaction temperature (298 K),  $n$  is the number of electrons,  $F$  is the Faraday constant ( $96485 \text{ C mol}^{-1}$ ),  $\theta$  is the charge transfer resistance calculated from EIS ( $R_{\text{CT}}$ ), and  $A$  is the area of the loaded catalyst on nickel foam ( $0.25 \text{ cm}^2$ ).

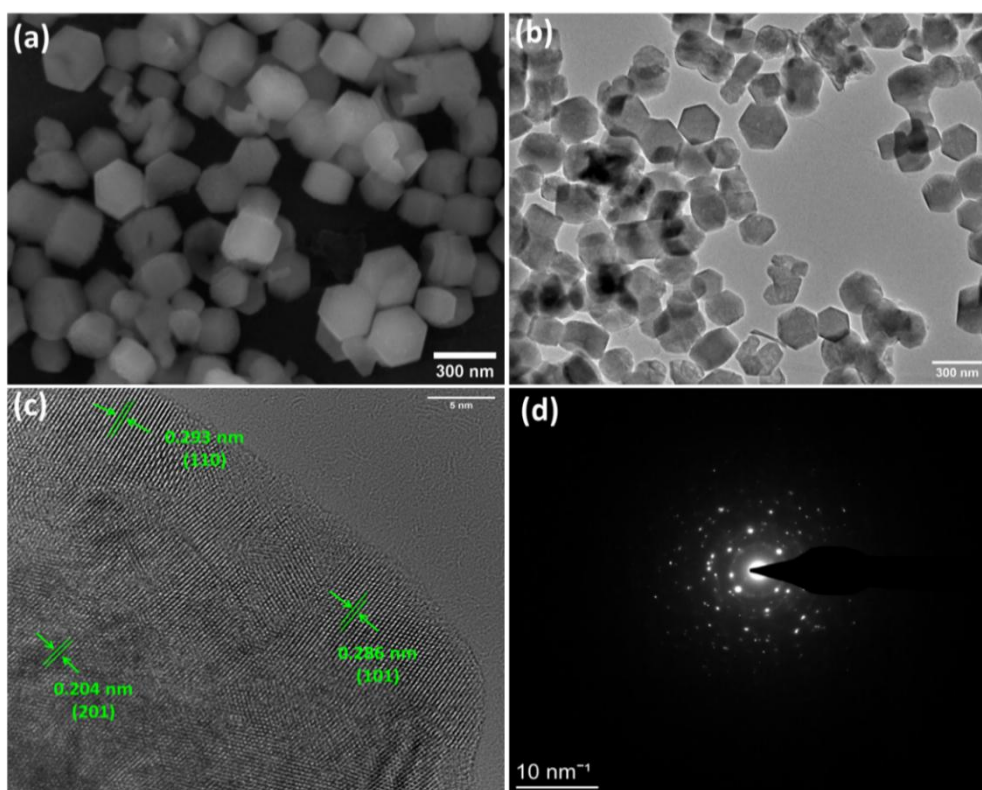

**Fig. S1.** (a) FESEM image, (b) TEM image, (c) HRTEM image, (d) SAED pattern of  $\text{NaYF}_4:\text{Yb}^{3+}/\text{Tm}^{3+}$ .

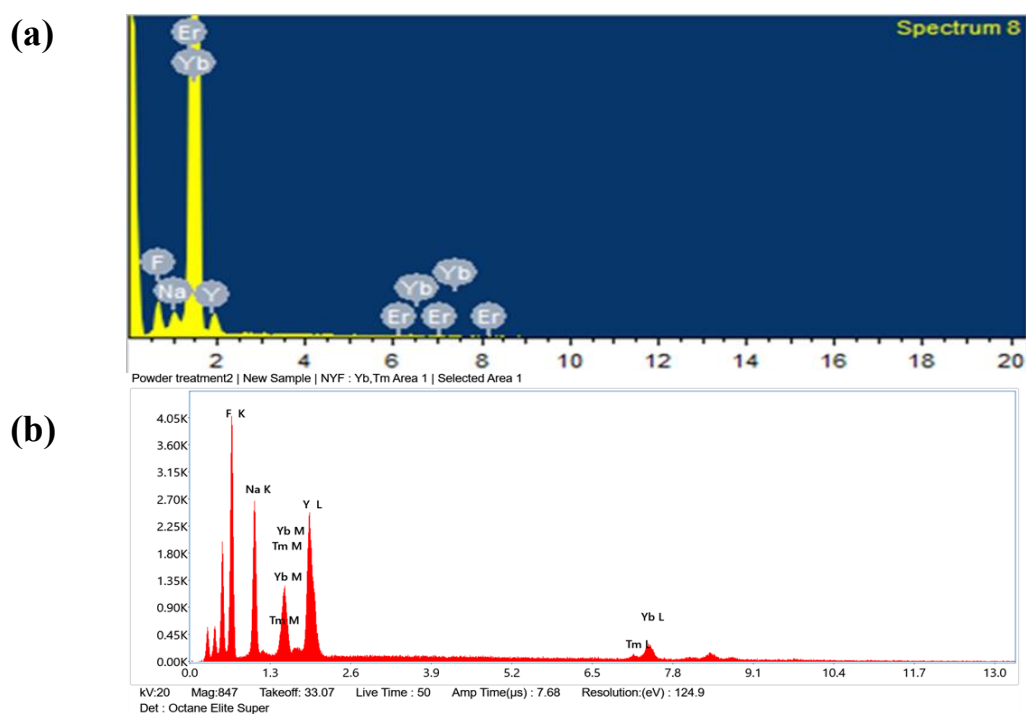

**Fig. S2.** EDS Spectra of (a)  $\text{NaYF}_4:\text{Yb}^{3+}/\text{Er}^{3+}$  and (b)  $\text{NaYF}_4:\text{Yb}^{3+}/\text{Tm}^{3+}$

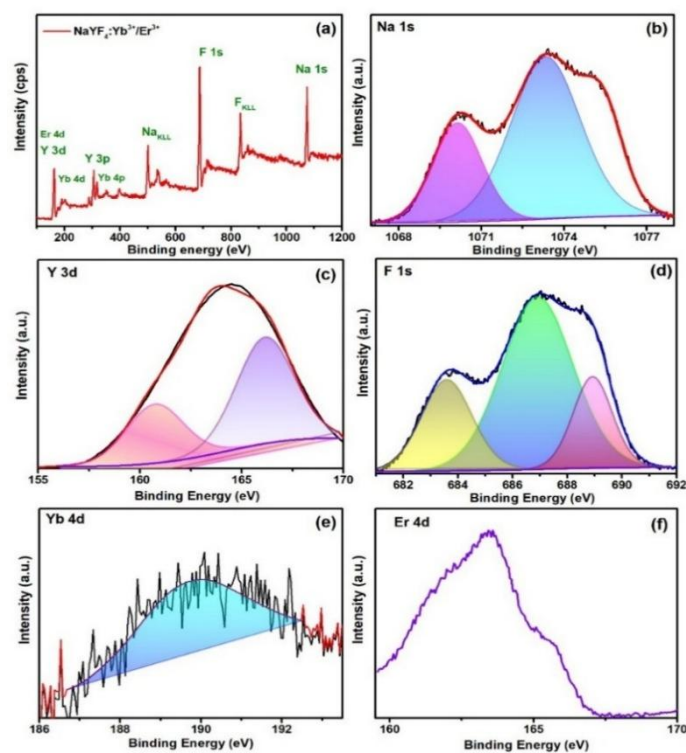

**Fig. S3.** (a) XPS Survey spectra, high-resolution XPS spectra for (b) Na 1s, (c) Y 3d, (d) F 1s, (e) Yb 4d, and (f) Er 4d of NaYF<sub>4</sub>:Yb<sup>3+</sup>/Er<sup>3+</sup>.

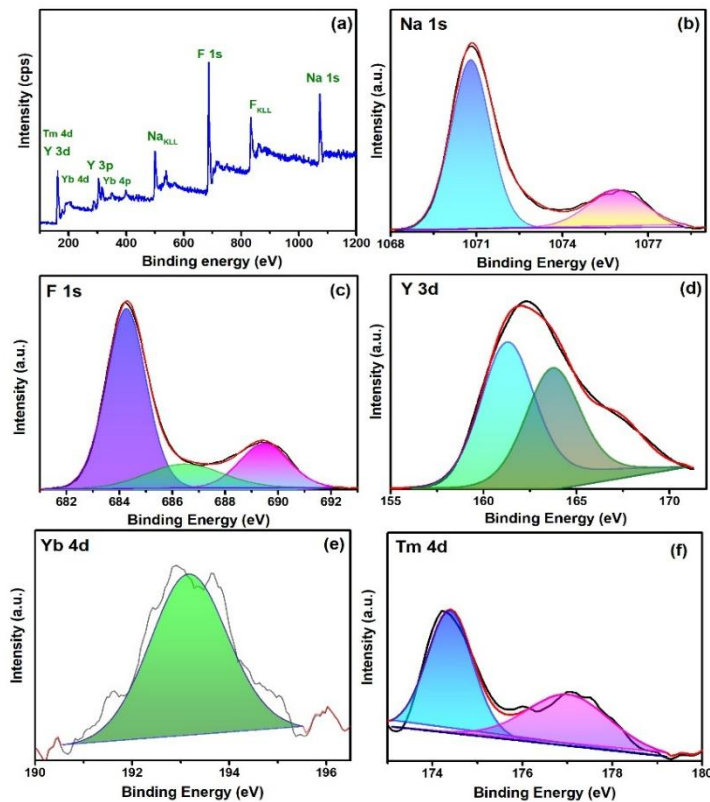

**Fig. S4.** (a) XPS Survey spectra, high-resolution XPS spectra for (b) Na 1s, (c) Y 3d, (d) F 1s, (e) Yb 4d, and (f) Tm 4d of NaYF<sub>4</sub>:Yb<sup>3+</sup>/Tm<sup>3+</sup>.

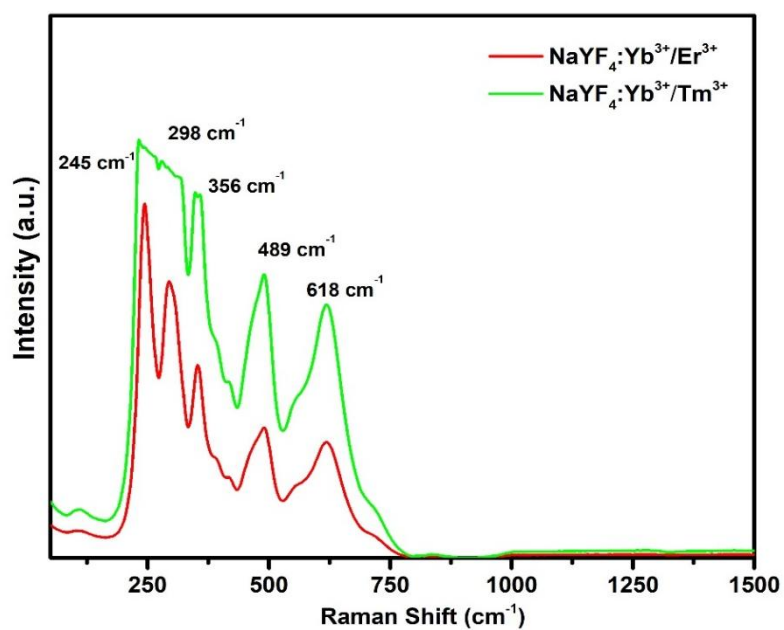

**Fig. S5.** Raman spectra of the UCNPs.

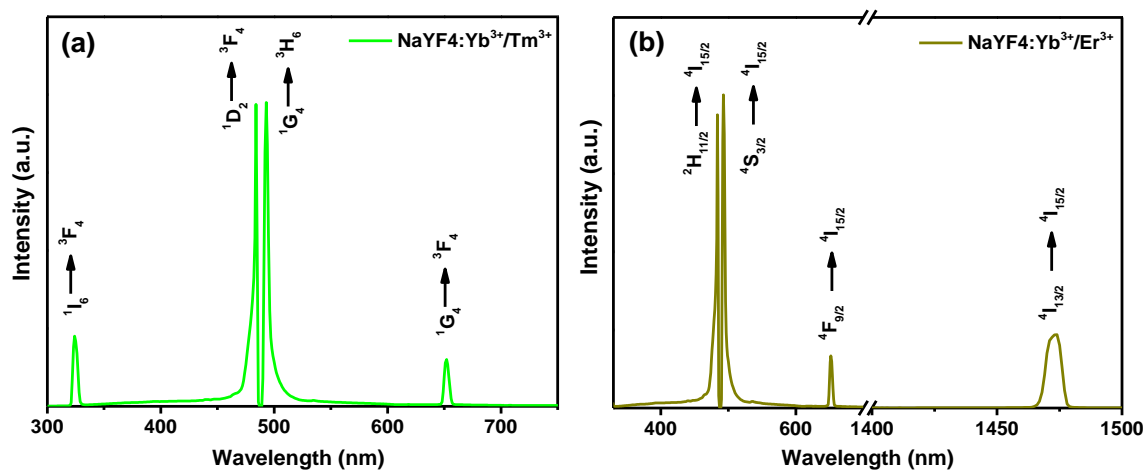

**Fig. S6.** (a) Upconversion photoluminescence spectra of (a)  $\text{NaYF}_4:\text{Yb}^{3+}/\text{Tm}^{3+}$  and (b)  $\text{NaYF}_4:\text{Yb}^{3+}/\text{Er}^{3+}$  under 980 nm excitation.

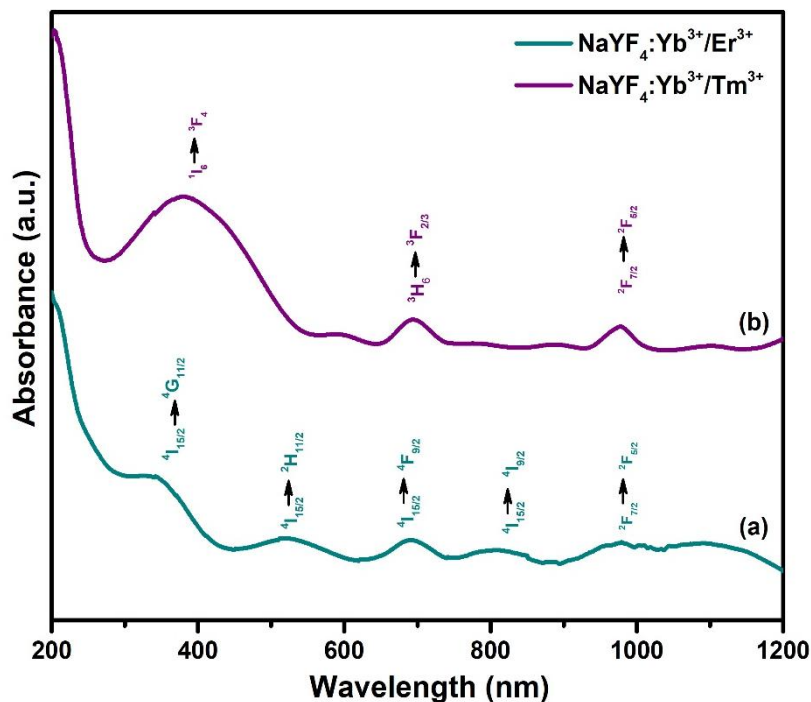

**Fig. S7.** UV-Vis-NIR spectra of NaYF<sub>4</sub>:Yb<sup>3+</sup>/Er<sup>3+</sup> (a) and NaYF<sub>4</sub>:Yb<sup>3+</sup>/Tm<sup>3+</sup> (b).

The Yb<sup>3+</sup>, Er<sup>3+</sup>/Tm<sup>3+</sup>-doped NaYF<sub>4</sub> UCNPs exhibit characteristic 4f-4f absorption bands. NaYF<sub>4</sub>:Yb<sup>3+</sup>/Er<sup>3+</sup> showed characteristics Er<sup>3+</sup> bands at 347, 523, 682, and 807 nm, corresponding to transitions from the <sup>4</sup>I<sub>15/2</sub> ground state to <sup>4</sup>G<sub>11/2</sub>, <sup>2</sup>H<sub>11/2</sub>, <sup>4</sup>F<sub>9/2</sub>, and <sup>4</sup>I<sub>9/2</sub>, respectively. The absorption band at ~982 nm, in the spectra of both the UCNPs, originate from Yb<sup>3+</sup> (<sup>2</sup>F<sub>7/2</sub> → <sup>2</sup>F<sub>5/2</sub>) and serves as the primary sensitization channel for NIR-to-visible upconversion. The NaYF<sub>4</sub>:Yb<sup>3+</sup>/Tm<sup>3+</sup> showed characteristics Tm<sup>3+</sup> bands at ~388 and ~690 nm corresponding to <sup>1</sup>I<sub>6</sub> → <sup>3</sup>F<sub>4</sub>, <sup>3</sup>H<sub>6</sub> → <sup>3</sup>F<sub>2/3</sub> transitions, respectively. These features confirm the presence of Yb<sup>3+</sup>, Er<sup>3+</sup>/Tm<sup>3+</sup> dopants in the β-NaYF<sub>4</sub>.



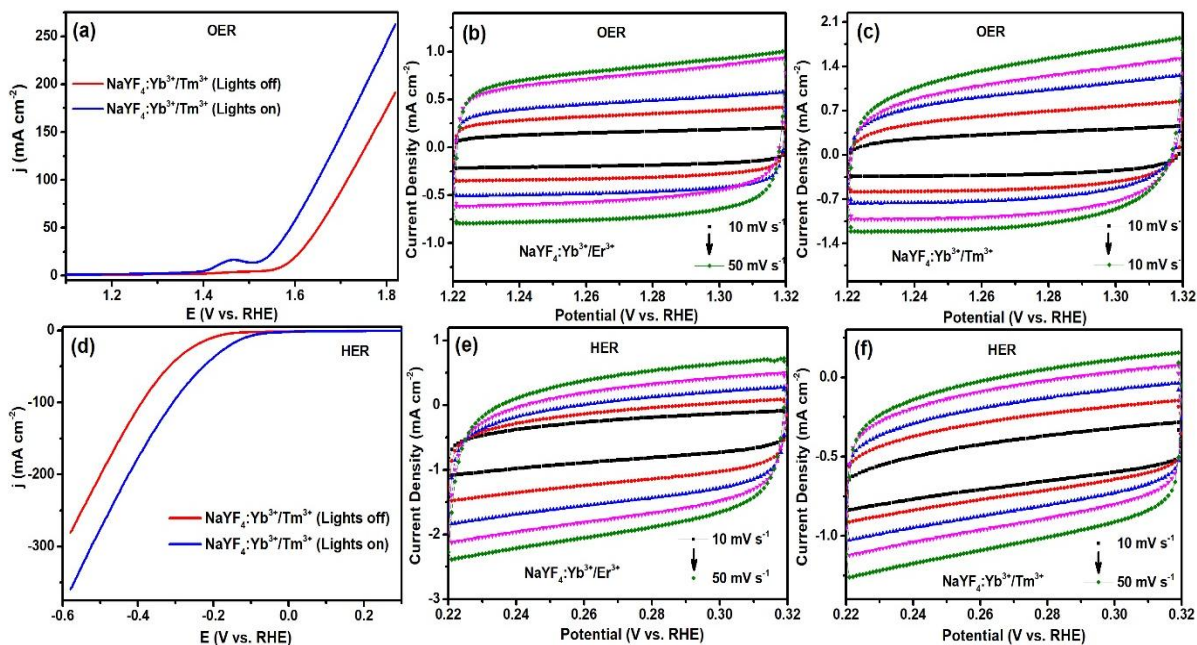

**Fig. S8.** (a) LSV (5mV/s) for OER  $\text{NaYF}_4:\text{Yb}^{3+}/\text{Tm}^{3+}$  with light on and light off, cyclic voltammetry obtained in a non-faradaic region at various scan rates for OER (b)  $\text{NaYF}_4:\text{Yb}^{3+}/\text{Er}^{3+}$ , (c)  $\text{NaYF}_4:\text{Yb}^{3+}/\text{Tm}^{3+}$ , (d) LSV (5mV/s) for HER  $\text{NaYF}_4:\text{Yb}^{3+}/\text{Tm}^{3+}$ , cyclic voltammetry obtained in a non-faradaic region at various scan rates for HER (e)  $\text{NaYF}_4:\text{Yb}^{3+}/\text{Er}^{3+}$ , (f)  $\text{NaYF}_4:\text{Yb}^{3+}/\text{Tm}^{3+}$ .

**Table S1.** Current density, Overpotential, and Tafel slope values of all samples for electrocatalytic OER conducted under dark conditions (lights off).

| Materials                                     | At Onset Potential | Overpotential at $25 \text{ mA cm}^{-2}$ | Overpotential at $50 \text{ mA cm}^{-2}$ | Tafel Slope ( $\text{mV dec}^{-1}$ ) |
|-----------------------------------------------|--------------------|------------------------------------------|------------------------------------------|--------------------------------------|
| $\text{NaYF}_4:\text{Yb}^{3+}/\text{Er}^{3+}$ | 350 mV             | 440 mV                                   | 500 mV                                   | 124                                  |
| $\text{NaYF}_4:\text{Yb}^{3+}/\text{Tm}^{3+}$ | 310 mV             | 370 mV                                   | 420 mV                                   | 113                                  |

**Table S2.** The obtained values of  $C_{dl}$ , ECSA, RF, exchange current density ( $i_{ex}$ ), and turnover frequency (TOF) of the synthesized electrocatalysts by OER under dark conditions (Light off).

| Materials                                             | $C_{dl}$ (mF) | ECSA (cm <sup>2</sup> ) | RF | $R_{CT}$ ( $\Omega$ ) | $R_s$ ( $\Omega$ ) | $i_{ex}$ | TOF (s <sup>-1</sup> ) |
|-------------------------------------------------------|---------------|-------------------------|----|-----------------------|--------------------|----------|------------------------|
| NaYF <sub>4</sub> :Yb <sup>3+</sup> /Er <sup>3+</sup> | 0.15          | 3.75                    | 15 | 9.2                   | 5.4                | 10.4     | 3.3                    |
| NaYF <sub>4</sub> :Yb <sup>3+</sup> /Tm <sup>3+</sup> | 0.21          | 5.25                    | 21 | 8.78                  | 3.4                | 11.7     | 6.5                    |

**Table S3.** Current density, Overpotential, and Tafel slope values of all samples for electrocatalytic HER conducted under dark conditions (lights off).

| Materials                                             | At Onset Potential | Overpotential at 25 mA cm <sup>-2</sup> | Overpotential at 50 mA cm <sup>-2</sup> | Tafel Slope (mV dec <sup>-1</sup> ) |
|-------------------------------------------------------|--------------------|-----------------------------------------|-----------------------------------------|-------------------------------------|
| NaYF <sub>4</sub> :Yb <sup>3+</sup> /Er <sup>3+</sup> | 95 mV              | 194 mV                                  | 275 mV                                  | 143                                 |
| NaYF <sub>4</sub> :Yb <sup>3+</sup> /Tm <sup>3+</sup> | 133 mV             | 252 mV                                  | 310 mV                                  | 136                                 |

**Table S4.** The obtained values of  $C_{dl}$ , ECSA, RF, exchange current density ( $i_{ex}$ ), and turnover frequency (TOF) of the synthesized electrocatalysts by HER under dark conditions (Light off)

| Materials                                             | $C_{dl}$ (mF) | ECSA (cm <sup>2</sup> ) | RF | $R_{CT}$ ( $\Omega$ ) | $R_s$ ( $\Omega$ ) | $i_{ex}$ (mA cm <sup>-2</sup> ) | TOF (s <sup>-1</sup> ) |
|-------------------------------------------------------|---------------|-------------------------|----|-----------------------|--------------------|---------------------------------|------------------------|
| NaYF <sub>4</sub> :Yb <sup>3+</sup> /Er <sup>3+</sup> | 0.22          | 5.5                     | 22 | 2.79                  | 4.51               | 18.4                            | 2.1                    |
| NaYF <sub>4</sub> :Yb <sup>3+</sup> /Tm <sup>3+</sup> | 0.09          | 2.25                    | 9  | 4.32                  | 3.87               | 11.9                            | 3.4                    |

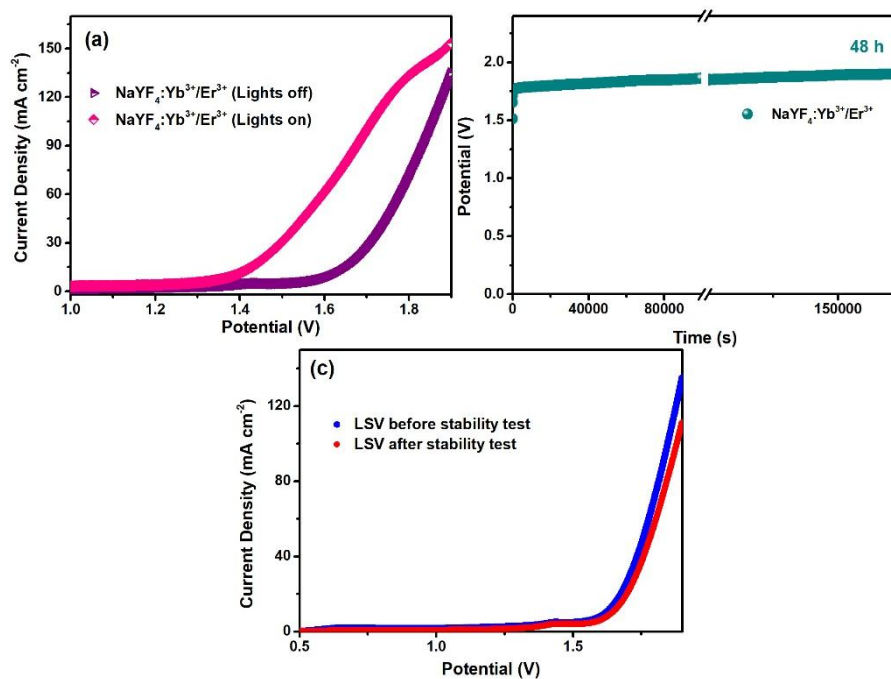

**Fig. S9.** (a) LSV curves of NaYF<sub>4</sub>:Yb<sup>3+</sup>/Er<sup>3+</sup>||NaYF<sub>4</sub>:Yb<sup>3+</sup>/Er<sup>3+</sup> water electrolysis cell in 1.0 M KOH, (b) Overall water splitting chronopotentiometric curve for 48 h, (c) LSV curves before and after 48 h stability test of NaYF<sub>4</sub>:Yb<sup>3+</sup>/Er<sup>3+</sup>.

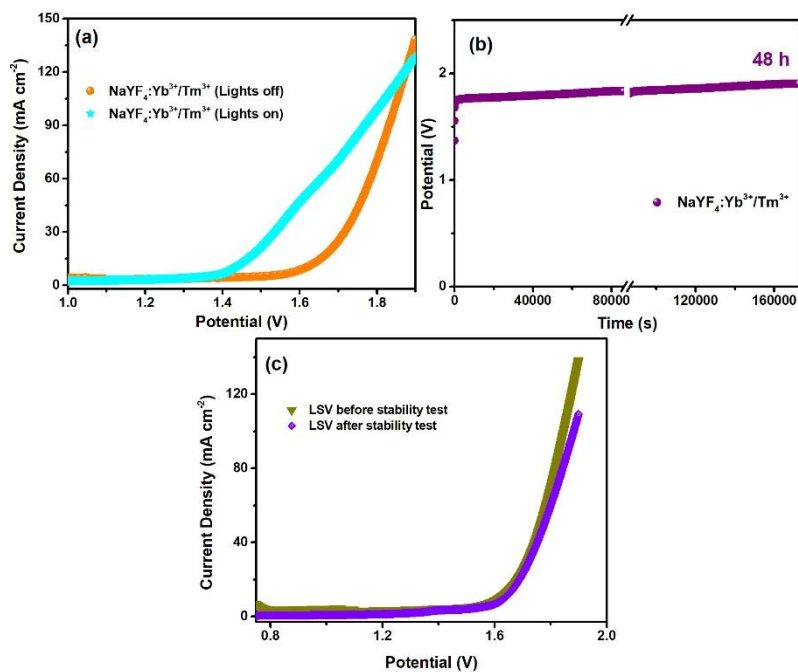

**Fig. S10.** (a) LSV curves of NaYF<sub>4</sub>:Yb<sup>3+</sup>/Tm<sup>3+</sup>||NaYF<sub>4</sub>:Yb<sup>3+</sup>/Tm<sup>3+</sup> water electrolysis cell in 1.0 M KOH, (b) Overall water splitting chronopotentiometric curve for 48 h, (c) LSV curves before and after 48 h stability test of NaYF<sub>4</sub>:Yb<sup>3+</sup>/Tm<sup>3+</sup>.

**Table S5.** Current density, Overpotential, and Tafel slope values of all samples for PEC-OER conducted under light irradiation (lights on).

| Materials                                             | At Onset Potential | Overpotential at 25 mA cm <sup>-2</sup> | Overpotential at 50 mA cm <sup>-2</sup> | Tafel Slope (mV dec <sup>-1</sup> ) |
|-------------------------------------------------------|--------------------|-----------------------------------------|-----------------------------------------|-------------------------------------|
| NaYF <sub>4</sub> :Yb <sup>3+</sup> /Er <sup>3+</sup> | 250 mV             | 330 mV                                  | 370 mV                                  | 102                                 |
| NaYF <sub>4</sub> :Yb <sup>3+</sup> /Tm <sup>3+</sup> | 240 mV             | 310 mV                                  | 350 mV                                  | 108                                 |

**Table S6.** The obtained values of C<sub>dl</sub>, ECSA, RF, exchange current density (i<sub>ex</sub>), and turnover frequency (TOF) of the synthesized electrocatalysts by PEC-OER (Light on).

| Materials                                             | C <sub>dl</sub> (mF) | ECSA (cm <sup>2</sup> ) | RF | R <sub>CT</sub> (Ω) | R <sub>s</sub> (Ω) | i <sub>ex</sub> | TOF (s <sup>-1</sup> ) |
|-------------------------------------------------------|----------------------|-------------------------|----|---------------------|--------------------|-----------------|------------------------|
| NaYF <sub>4</sub> :Yb <sup>3+</sup> /Er <sup>3+</sup> | 0.31                 | 7.75                    | 31 | 6.3                 | 2.9                | 16.3            | 5.7                    |
| NaYF <sub>4</sub> :Yb <sup>3+</sup> /Tm <sup>3+</sup> | 0.27                 | 6.75                    | 27 | 3.7                 | 3.3                | 27.8            | 16.7                   |

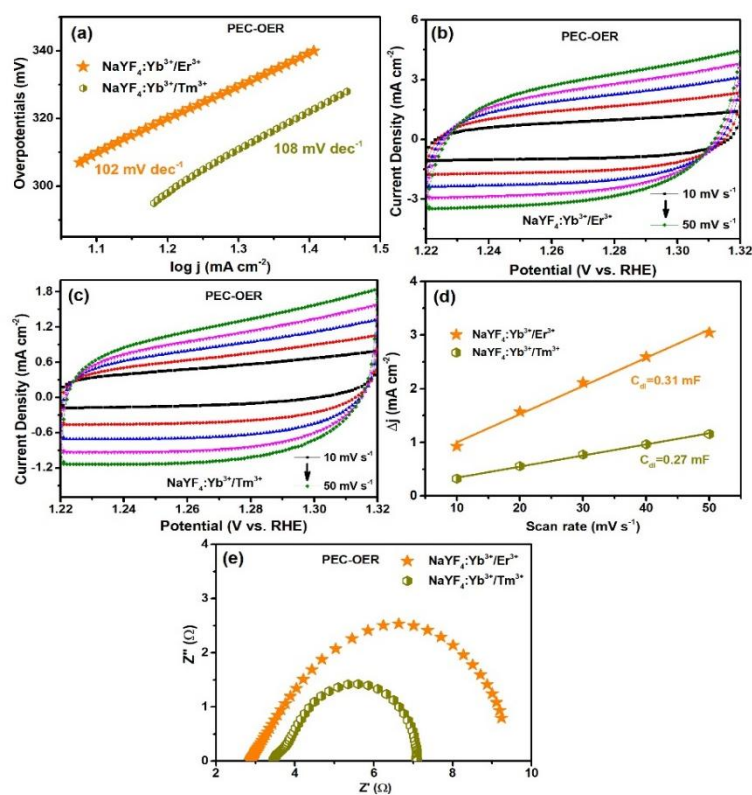

**Fig. S11.** (a) Tafel slopes, (b) and (c) CV curves at various scan rates, (d)  $\Delta j$  vs. scan rate plot for C<sub>dl</sub> calculation, and (e) EIS plots of the UCNPs (NaYF<sub>4</sub>:Yb<sup>3+</sup>/Er<sup>3+</sup>, NaYF<sub>4</sub>:Yb<sup>3+</sup>/Tm<sup>3+</sup>) as catalysts for PEC-OER (under the light exposure).

**Table S7.** Overpotential and Tafel slope values of all samples for PEC-HER conducted under light irradiation (lights on).

| Materials                                             | At Onset Potential | Overpotential at 25 mA cm <sup>-2</sup> | Overpotential at 50 mA cm <sup>-2</sup> | Tafel Slope (mV dec <sup>-1</sup> ) |
|-------------------------------------------------------|--------------------|-----------------------------------------|-----------------------------------------|-------------------------------------|
| NaYF <sub>4</sub> :Yb <sup>3+</sup> /Er <sup>3+</sup> | 88 mV              | 185 mV                                  | 240 mV                                  | 128                                 |
| NaYF <sub>4</sub> :Yb <sup>3+</sup> /Tm <sup>3+</sup> | 60 mV              | 165 mV                                  | 223 mV                                  | 126                                 |

**Table S8.** The obtained values of C<sub>dl</sub>, ECSA, RF, exchange current density (i<sub>ex</sub>), and turnover frequency (TOF) of the synthesized electrocatalysts by PEC-HER.

| Materials                                             | C <sub>dl</sub> (mF) | ECSA (cm <sup>2</sup> ) | RF | R <sub>CT</sub> (Ω) | R <sub>s</sub> (Ω) | i <sub>ex</sub> | TOF (s <sup>-1</sup> ) |
|-------------------------------------------------------|----------------------|-------------------------|----|---------------------|--------------------|-----------------|------------------------|
| NaYF <sub>4</sub> :Yb <sup>3+</sup> /Er <sup>3+</sup> | 0.41                 | 10.25                   | 41 | 2.43                | 3.73               | 21.1            | 5.1                    |
| NaYF <sub>4</sub> :Yb <sup>3+</sup> /Tm <sup>3+</sup> | 0.15                 | 3.75                    | 15 | 2.88                | 3.23               | 17.8            | 8.9                    |

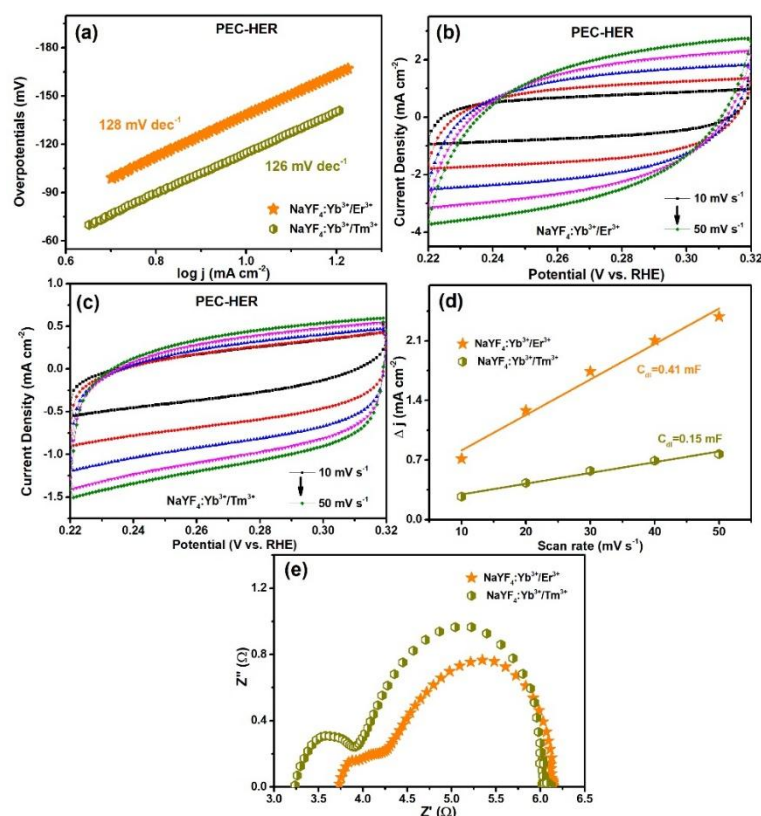

**Fig. S12.** (a) Tafel slopes, (b) and (c) CV curves at various scan rates, (d)  $\Delta j$  vs. scan rate plot for C<sub>dl</sub> calculation, and (e) EIS plots of the UCNPs (NaYF<sub>4</sub>:Yb<sup>3+</sup>/Er<sup>3+</sup>, NaYF<sub>4</sub>:Yb<sup>3+</sup>/Tm<sup>3+</sup>) as catalysts for PEC-HER (under the light exposure).

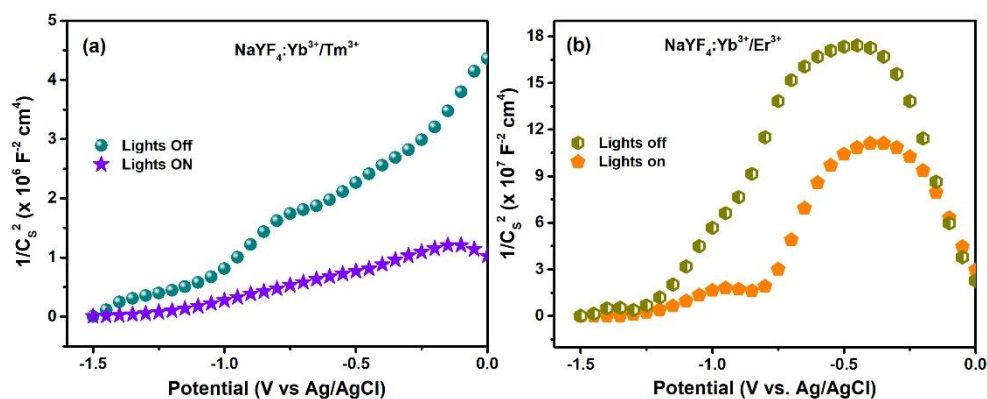

**Fig. S13.** Mott-Schottky plots of (a)  $\text{NaYF}_4:\text{Yb}^{3+}/\text{Tm}^{3+}$ , (b)  $\text{NaYF}_4:\text{Yb}^{3+}/\text{Er}^{3+}$  in the presence and absence of light.

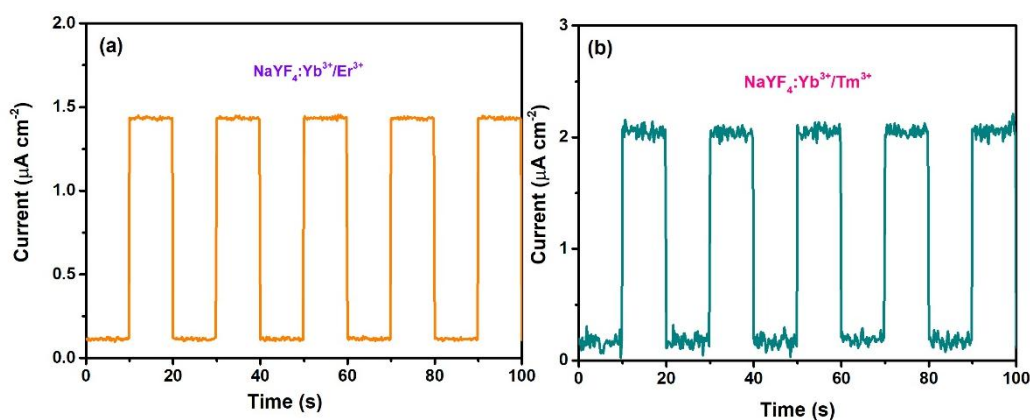

**Fig. S14.** Transient photocurrent response plots of (a)  $\text{NaYF}_4:\text{Yb}^{3+}/\text{Er}^{3+}$ , (b)  $\text{NaYF}_4:\text{Yb}^{3+}/\text{Tm}^{3+}$ .

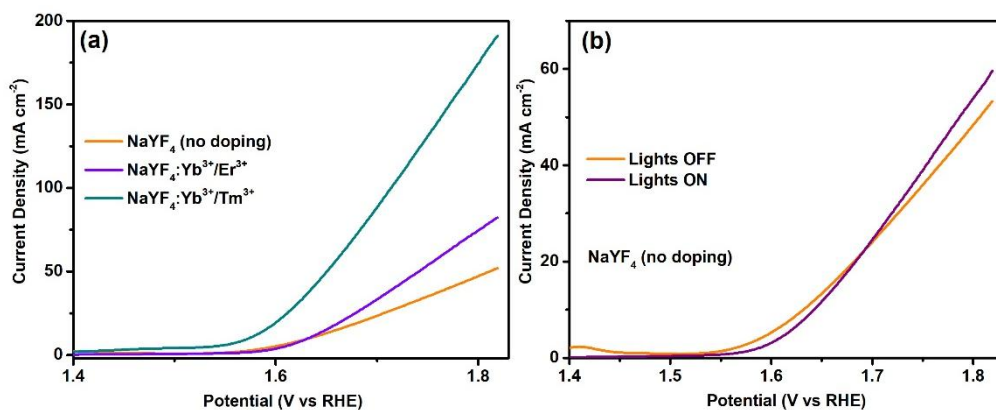

**Fig. S15.** (a) Comparison of OER performance of undoped- $\text{NaYF}_4$  with lanthanides ( $\text{Yb}^{3+}$ ,  $\text{Er}^{3+}/\text{Tm}^{3+}$ )-doped  $\beta\text{-NaYF}_4$ , (b) OER by undoped- $\text{NaYF}_4$  in Lights Off/On conditions (No significant increase in the current response or decrease in overpotential, unlike the doped samples (Fig. 2a, S8a)).
